# Supplementary material for: Organocatalytic asymmetric α-bromination of aldehydes and ketones
Source: Royal Society of Chemistry journal article supplement (doi:10.1039/b509366j), 2005-01-01
Supplement: b509366j.pdf [file b509366j.pdf]

# Organocatalytic Asymmetric $\alpha$ -Bromination of Aldehydes and Ketones

Søren Bertelsen, Nis Halland, Stephan Bachmann, Mauro Marigo, Alan Braunton and Karl Anker Jørgensen\*

## Supporting Information - Experimental for Bromination

**General Methods.** The  $^1\text{H}$  NMR and  $^{13}\text{C}$  NMR spectra were recorded at 400 MHz and 100 MHz, respectively. The chemical shifts are reported in ppm relative to  $\text{CHCl}_3$  ( $\delta = 7.26$ ) for  $^1\text{H}$  NMR and relative to the central  $\text{CDCl}_3$  resonance ( $\delta = 77.0$ ) for  $^{13}\text{C}$  NMR.  $J$  values are given in Hz. Flash chromatography (FC) was carried out using Merck silica gel 60 (230-400 mesh) unless otherwise stated. Optical rotation was measured on a Perkin-Elmer 241 polarimeter. NMR data of known compounds is in agreement with literature values.

**Materials.** Commercially available substrates and organocatalysts were used without further purification. All solvents were of p.a. quality and used without further purification. Commercially available NBS was recrystallised from  $\text{H}_2\text{O}$  before use.

**General procedure for the organocatalytic  $\alpha$ -bromination of aldehydes.** To a cooled ( $-40\text{ }^\circ\text{C}$ ) solution of the catalyst (0.10 mmol, 20 mol%), benzoic acid (0.10 mmol), water (1.0 mmol) and aldehyde (1.0 mmol) in  $\text{CH}_2\text{Cl}_2$ -pentane 1:1 (2.0 mL) the bromine source (0.50 mmol) was added and the reaction mixture was stirred at  $-40\text{ }^\circ\text{C}$ . After 90 min. the reaction was diluted with 4 mL MeOH and  $\text{NaBH}_4$  (2.0 mmol) was added and the reaction mixture was allowed to warm to room temperature. The reaction was quenched with  $\text{NH}_4\text{Cl}$  after 20 min. The mixture was extracted twice with  $\text{Et}_2\text{O}$  and the combined organic phases washed successively with  $\text{H}_2\text{O}$ , sat.  $\text{NaHCO}_3$  and 1 M HCl. The organic phase was dried ( $\text{MgSO}_4$ ), filtered and concentrated under reduced pressure. **OBS: The alcohols are fairly volatile and attention should be paid to avoid excessive evaporation.** Purification by FC (20 %  $\text{Et}_2\text{O}$  in Pentane) gave the pure products.

**2-Bromo 3-methyl propionaldehyde 4a.** The ee was determined by GC on a Chrompak CPChirasil Dex CB-column. Temperature program:  $70\text{ }^\circ\text{C}$  isotherm.  $R_t$  (min): 11.9 ((R)-**4a**); 12.4 ((S)-**4a**). Enantiomers assigned by analogy to **5f**. Isolated as 2-Bromo-3-methyl-butan-1-ol (**5a**) after reduction with  $\text{NaBH}_4$ .  $^1\text{H}$

NMR  $\delta$  1.01 (3H, d,  $J$  6.6), 1.04 (3H, d,  $J$  6.7), 1.96-2.07 (1H, m), 2.09 (1H, br s), 3.82 (2H, d,  $J$  6.1) and 4.10 (1H, dt,  $J$  6.3, 10.8).  $^{13}\text{C}$  NMR  $\delta$  19.0, 20.8, 31.4, 65.7, 68.2.

**2-Bromo 3,3-dimethyl propionaldehyde 4b.** The ee was determined by GC on a Chropak CPChirasil Dex CB-column. Temperature program: From 70 °C to 90 °C at 10 °C/min and then isotherm.  $R_t$  (min): 8.0 ((R)-**4b**); 8.4 ((S)-**4b**). Enantiomers assigned by analogy to **5f**. Isolated as 2-Bromo-3,3-dimethyl-butan-1-ol (**5b**) after reduction with  $\text{NaBH}_4$ .  $^1\text{H}$  NMR  $\delta$  1.09 (9H, s), 2.04 (1H, br s) 3.75 (1H, dd,  $J$  9.5, 12.4), 3.92 (1H, d,  $J$  12.3) and 4.07-4.10 (1H, m).  $^{13}\text{C}$  NMR  $\delta$  27.8 (3C), 34.8, 64.4, 74.7.

**2-Bromo butanal 4c.** The ee was determined by GC on a Chropak CPChirasil Dex CB-column. Temperature program: 55 °C isotherm for 11 min, then to 150 °C at a rate of 10 °C/min.  $R_t$  (min): 13.2 ((R)-**4c**); 13.5 ((S)-**4c**). Enantiomers assigned by analogy to **5f**. Isolated as 2-Bromo-butan-1-ol (**5c**) after reduction with  $\text{NaBH}_4$ .  $^1\text{H}$  NMR  $\delta$  1.05 (3H, t,  $J$  7.3), 1.77-1.97 (2H, m), 2.30 (1H, br s), 3.72-3.83 (2H, m) and 4.04-4.10 (1H, m).  $^{13}\text{C}$  NMR  $\delta$  12.0, 28.0, 61.6, 68.9.

**2-Bromo Pentanal 4d.** The ee was determined by GC on a Chropak CPChirasil Dex CB-column. Temperature program: 70 °C isotherm.  $R_t$  (min): 12.0 ((R)-**4d**); 12.7 ((S)-**4d**). Enantiomers assigned by analogy to **5f**. Isolated as 2-Bromo-pentan-1-ol (**5d**) after reduction with  $\text{NaBH}_4$ .  $^1\text{H}$  NMR  $\delta$  0.92 (3H, t,  $J$  7.4), 1.36-1.63 (2H, m), 1.77-1.83 (2H, m), 2.45 (1H, br s), 3.70-3.82 (2H, m) and 4.09-4.16 (1H, m).  $^{13}\text{C}$  NMR  $\delta$  13.4, 20.6, 36.7, 59.5, 67.2.

**2-Bromo octanal 4e.** The ee was determined by GC on a Chropak CPChirasil Dex CB-column. Temperature program: 70 °C to 100 °C at a rate of 10 °C/min then isotherm.  $R_t$  (min): 19.0 ((R)-**4e**); 19.5 ((S)-**4e**). Enantiomers assigned by analogy to **5f**. Isolated as 2-Bromo-octan-1-ol (**5e**) after reduction with  $\text{NaBH}_4$ . Spectroscopic data are in agreement with literature data.<sup>1</sup>

**Bromo-cyclohexyl-acetaldehyde 4f.** The ee was determined by GC on a Chropak CPChirasil Dex CB-column. Temperature program: 70 °C to 105 °C at a rate of 10 °C/min then isotherm.  $R_t$  (min): 26.9 ((R)-**4f**); 27.4 ((S)-**4f**). Isolated as 2-Bromo-2-cyclohexyl-ethanol (**5f**) after reduction with  $\text{NaBH}_4$ .  $^{13}\text{C}$  NMR  $\delta$  25.8, 25.9, 26.0, 30.0, 30.8, 41.1, 65.1, 67.0.  $[\alpha]_D^{20}$  -20.1 ( $c$  0.80,  $\text{CH}_2\text{Cl}_2$ ). (Litt:  $[\alpha]_D^{20}$  -22.9 ( $c$  0.75,  $\text{CH}_2\text{Cl}_2$ )).  $^1\text{H}$ -NMR spectroscopic data are in agreement with literature data. Absolute configuration determined by comparison with optical rotation.<sup>2</sup>

**2-Bromo-pent-4-enal 4g.** The ee was determined by GC on a Chropak CPChirasil Dex CB-column. Temperature program: 65 °C isotherm.  $R_t$  (min): 18.8 ((R)-**4g**); 19.9 ((S)-**4g**). Enantiomers assigned by

analogy to **5f**. Isolated as 2-Bromo-pent-4-en-1-ol (**5g**) after reduction with NaBH<sub>4</sub>. <sup>1</sup>H NMR δ 2.40 (1H, br s), 2.57-2.71 (2H, m), 3.73-3.83 (2H, m), 4.09-4.15 (2H, m), 5.13-5.17 (2H, m) and 5.76-5.87 (1H, m). <sup>13</sup>C NMR δ 39.1, 57.1, 66.5, 118.3, 134.0.

**General procedure for the preparation of catalyst 3d.** Catalyst **3d** was prepared by condensation of (1*R*,2*R*)-diphenylethylenediamine (1.0 eq.) with paraformaldehyde (1.0 eq.) as a 0.10 M solution in CH<sub>2</sub>Cl<sub>2</sub> for 24 h at ambient temperature. The catalyst was used directly as a solution, or isolated as the corresponding salt by addition of benzoic acid and removal of the solvent at ambient temperature.

**General procedure for the organocatalytic α-bromination of ketones.** To a cooled (-30 °C) solution of the catalyst **3d** (0.10 mmol, 20 mol%) and the ketone (0.75 mmol) in THF (1.0 mL) 4,4-dibromo-2,6-di-tert-butyl-cyclohexa-2,5-dienone **2b** (0.50 mmol) was added and the reaction mixture was stirred at -30 °C. After the time indicated in Table 3, the cold reaction mixture was filtered through a short pad of Iatrobeads 6RS-8060 using 10% Et<sub>2</sub>O in CH<sub>2</sub>Cl<sub>2</sub> to remove the catalyst. After evaporation of the solvent (several of the α-bromoketones are volatile) the α-bromoketones were purified by FC on Iatrobeads 6RS-8060 using CH<sub>2</sub>Cl<sub>2</sub>/Et<sub>2</sub>O.

**α-Bromo-cyclohexanone 4h.** Isolated as the syn-2-bromocyclohexanol **5h** after NaBH<sub>4</sub> reduction of the α-bromo-cyclohexanone **4h** in 70% yield (2 steps) by the following procedure. The reaction mixture from the α-bromination reaction was diluted with 5 mL of cold MeOH (-30 °C) and 150 mg of NaBH<sub>4</sub> was added. After 5 min at -30 °C the reaction was allowed to go to 0 °C and stirred at that temperature for another 20 min after which it was quenched by the addition of 1 mL 1M HCl. The mixture was extracted twice with EtOAc and the organic phases dried over Na<sub>2</sub>SO<sub>4</sub>. After evaporation of the solvent the syn-2-bromocyclohexanol was obtained as a single diastereomer after FC on silica gel using CH<sub>2</sub>Cl<sub>2</sub>/Et<sub>2</sub>O as the eluent. syn-2-Bromocyclohexanol **5h**. <sup>1</sup>H NMR δ 1.32-1.48 (2H, m), 1.63-1.77 (3H, m), 1.79-1.87 (1H, m), 1.88-1.97 (1H, m), 2.04 (1H, d, *J* 6.4), 2.15-2.24 (1H, m), 3.69 (1H, br m) and 4.50 (1H, m); <sup>13</sup>C NMR δ 21.5, 23.1, 31.2, 32.4, 62.2, 70.4; HRMS (TOF ES<sup>+</sup>) *m/z* 200.9907 (M+Na) calcd. for C<sub>6</sub>H<sub>11</sub>OBrNa<sup>+</sup> 200.9891.

Alternatively, the α-Bromo-cyclohexanone **4h** could be purified directly by FC on iatrobeads as described in the general procedure using CH<sub>2</sub>Cl<sub>2</sub> as the eluent, but a decrease of 10-15% in optical purity was usually observed. The ee was determined by GC on a Astec G-TA column. Temperature program: From 70 °C to 125 °C at a rate of 10 °C/min and then isotherm. R<sub>t</sub> (min): 9.3 and 9.6 min.

**α-Bromotetrahydropyran-4-one 4i.** Isolated as described in the general procedure above. <sup>1</sup>H NMR δ 2.60-2.68 (1H, m), 2.98 (1H, dt, *J* 4.8, 14.8), 3.86-3.96 (2H, m), 4.06-4.12 (1H, m), 4.29 (1H, dd, *J* 5.6, 12.8) and

4.47 (1H, dd,  $J$  4.8, 5.6);  $^{13}\text{C}$  NMR  $\delta$  41.2, 51.0, 68.3, 73.7, 198.1; HRMS (TOF ES<sup>+</sup>)  $m/z$  200.9514 (M+Na) calcd. for  $\text{C}_5\text{H}_7\text{O}_2\text{BrNa}^+$  200.9527. The ee was determined by GC on a Chrompak CP-Chirasil Dex CB-column. Temperature program: From 70 °C to 130 °C at a rate of 10 °C/min and then isotherm.  $R_t$  (min): 10.0 and 10.2 min.

**$\alpha$ -Bromo-1,4-cyclohexanedionemonoethyleneketal 4j.** Isolated as described in the general procedure above.  $^1\text{H}$  NMR  $\delta$  2.02-2.07 (2H, m), 2.39 (1H, dd,  $J$  12.8, 13.2), 2.61 (1H, dd,  $J$  6.4, 13.2), 2.67-2.71 (2H, m), 4.01-4.08 (4H, m) and 4.82 (1H, dd,  $J$  6.4, 12.8);  $^{13}\text{C}$  NMR  $\delta$  34.3, 35.9, 45.8, 51.2, 64.7, 65.0, 106.9, 200.6; HRMS (TOF ES<sup>+</sup>)  $m/z$  256.9785 (M+Na) calcd. for  $\text{C}_5\text{H}_7\text{O}_2\text{BrNa}^+$  256.9789. The ee was determined by GC on a Chrompak CP-Chirasil Dex CB-column. Temperature program: From 70 °C to 180 °C at a rate of 10 °C/min and then isotherm.  $R_t$  (min): 13.1 and 13.4 min.

#### X-Ray work:

Crystals of 3-bromotetrahydropyran-4-one,  $\text{C}_5\text{H}_7\text{BrO}_2$ , are orthorhombic,  $P2_12_12_1$ , with unit cell:  $a = 4.3135(4)\text{\AA}$ ,  $b = 11.327(1)\text{\AA}$ ,  $c = 12.558(1)\text{\AA}$ ,  $V = 613.57(9)\text{\AA}^3$ ,  $Z = 4$ . Data were collected at 100K on an APEX diffractometer with CCD detector. The structure solved by direct methods and refined by least squares methods to final  $R = 0.031$ ,  $R_w = 0.033$ ,  $\text{GOF} = 0.870$  using 2585 reflections with  $I > 0$ , 103 parameters refined. Least squares refinement included a parameter according to Rogers<sup>4</sup> refined against all positive reflections including 1063 Bijvoet pairs.

<sup>1</sup> H. Masuda, K. Takase, M. Nishio, A. Hasegawa, Y. Nishiyama and Y. Ishii; *J. Org. Chem.* **1994**, *59*, 5550.

<sup>2</sup> P. L. Bailey, A. D. Briggs, R. F. W. Jackson and J. Pietruszka; *J. Chem. Soc., Perkin Trans. 1*, **1998**, 3359.

<sup>3</sup> The quality of 1,2-diphenylethylenediamine obtained from commercial sources was found to vary from batch to batch and therefore the 1,2-diphenylethylenediamine was recrystallized from tBuOMe before use.

<sup>4</sup> D. Rogers, *Acta Cryst.* **1981**, *A37*, 734.
